# Supplementary material for: Assessment of Hematologic and Biochemical Parameters for Healthy Commercial Pigs in China
Source: MDPI journal article supplement (doi:10.3390/ani12182464), 2022-09-18
Supplement: s1 [file s1]

**Table S1.** Descriptive statistics of blood parameters for commercial pigs in China.

| Variable | Unit                | N   | Mean   | Sd     | Median | Trimmed | Min    | Max     | Se    |
|----------|---------------------|-----|--------|--------|--------|---------|--------|---------|-------|
| WBC      | 10 <sup>9</sup> /L  | 193 | 16.19  | 4.05   | 16.28  | 16.19   | 5.58   | 26.90   | 0.29  |
| RBC      | 10 <sup>12</sup> /L | 192 | 6.82   | 0.69   | 6.82   | 6.85    | 4.93   | 8.68    | 0.05  |
| HGB      | g/dL                | 193 | 113.12 | 11.66  | 112.00 | 112.66  | 86.00  | 149.00  | 0.84  |
| HCT      | %                   | 193 | 38.41  | 3.99   | 38.40  | 38.34   | 30.20  | 47.50   | 0.29  |
| MCV      | fL                  | 192 | 56.57  | 4.10   | 56.70  | 56.60   | 41.80  | 72.60   | 0.29  |
| MCH      | pg                  | 194 | 16.66  | 1.44   | 16.40  | 16.54   | 12.10  | 22.40   | 0.10  |
| MCHC     | g/dL                | 194 | 294.42 | 12.24  | 293.00 | 294.08  | 265.00 | 325.00  | 0.88  |
| CHCM     | g/dL                | 194 | 332.13 | 13.30  | 333.00 | 332.40  | 299.00 | 373.00  | 0.95  |
| CH       | pg                  | 194 | 18.75  | 1.79   | 18.85  | 18.73   | 12.80  | 25.40   | 0.13  |
| RDW      | %                   | 194 | 18.99  | 2.43   | 18.25  | 18.58   | 15.90  | 29.60   | 0.17  |
| HDW      | g/dL                | 192 | 21.00  | 1.98   | 20.60  | 20.84   | 17.50  | 32.50   | 0.14  |
| PLT      | 10 <sup>9</sup> /L  | 193 | 260.15 | 138.45 | 248.00 | 252.29  | 29.00  | 724.00  | 9.91  |
| MPV      | fL                  | 192 | 9.58   | 1.42   | 9.40   | 9.52    | 5.60   | 15.00   | 0.10  |
| %NEUT    | %                   | 192 | 35.31  | 9.58   | 36.15  | 35.33   | 11.70  | 60.90   | 0.69  |
| %LYMPH   | %                   | 192 | 50.09  | 10.75  | 49.95  | 50.63   | 6.70   | 73.80   | 0.77  |
| %MONO    | %                   | 190 | 6.95   | 3.13   | 6.75   | 6.71    | 0.60   | 17.50   | 0.23  |
| %EOS     | %                   | 192 | 4.53   | 2.25   | 4.05   | 4.23    | 1.10   | 16.90   | 0.16  |
| %BASO    | %                   | 193 | 0.43   | 0.22   | 0.40   | 0.39    | 0.20   | 1.50    | 0.02  |
| %LUC     | %                   | 194 | 1.90   | 1.08   | 1.70   | 1.81    | 0.30   | 5.00    | 0.08  |
| #NEUT    | 10 <sup>9</sup> /L  | 192 | 5.66   | 1.96   | 5.56   | 5.63    | 1.11   | 11.19   | 0.14  |
| #LYMPH   | 10 <sup>9</sup> /L  | 194 | 8.10   | 2.79   | 8.21   | 8.11    | 0.78   | 14.29   | 0.20  |
| #MONO    | 10 <sup>9</sup> /L  | 193 | 1.13   | 0.59   | 1.03   | 1.07    | 0.15   | 3.36    | 0.04  |
| #EOS     | 10 <sup>9</sup> /L  | 191 | 0.77   | 0.48   | 0.65   | 0.70    | 0.14   | 4.15    | 0.03  |
| #BASO    | 10 <sup>9</sup> /L  | 191 | 0.07   | 0.04   | 0.06   | 0.06    | 0.02   | 0.28    | 0.01  |
| #LUC     | 10 <sup>9</sup> /L  | 193 | 0.30   | 0.17   | 0.27   | 0.28    | 0.04   | 0.88    | 0.01  |
| TP       | g/dL                | 193 | 61.95  | 12.70  | 57.70  | 61.54   | 42.50  | 90.70   | 0.91  |
| ALB      | g/dL                | 193 | 32.45  | 5.93   | 33.40  | 32.74   | 19.60  | 45.30   | 0.42  |
| AST      | U/L                 | 193 | 41.94  | 15.21  | 39.00  | 39.95   | 17.00  | 100.00  | 1.09  |
| ALT      | U/L                 | 193 | 42.72  | 10.70  | 41.00  | 41.64   | 23.00  | 77.00   | 0.77  |
| ALP      | U/L                 | 190 | 31.02  | 26.62  | 26.00  | 27.19   | 1.00   | 158.00  | 1.92  |
| TC       | mg/dL               | 194 | 82.44  | 18.21  | 81.45  | 81.64   | 42.49  | 179.44  | 1.30  |
| TG       | mg/dL               | 192 | 42.32  | 18.26  | 39.17  | 40.83   | 9.86   | 104.44  | 1.31  |
| GLU      | mg/dL               | 193 | 73.96  | 24.76  | 74.00  | 74.29   | 16.10  | 127.10  | 1.77  |
| CREA     | mg/dL               | 194 | 98.75  | 35.85  | 90.00  | 93.08   | 43.00  | 240.00  | 2.56  |
| HDL      | mg/dL               | 194 | 43.54  | 8.72   | 42.68  | 43.13   | 15.77  | 76.96   | 0.62  |
| LDL      | mg/dL               | 194 | 58.81  | 17.93  | 59.01  | 58.25   | 22.70  | 176.00  | 1.28  |
| BUN      | mg/dL               | 193 | 5.11   | 2.68   | 4.40   | 4.77    | 1.60   | 13.50   | 0.19  |
| GGT      | U/L                 | 194 | 76.49  | 45.31  | 63.50  | 70.13   | 17.00  | 279.00  | 3.24  |
| CK       | U/L                 | 190 | 888.57 | 989.36 | 604.50 | 688.90  | 199.00 | 8986.00 | 71.40 |

WBC = white blood cell, RBC = red blood cell, HGB = hemoglobin, HCT = hematocrit, MCV = mean corpuscular volume, MCH = mean corpuscular hemoglobin, MCHC = mean corpuscular hemoglobin concentration, CHCM = cellular hemoglobin concentration mean, CH = corpuscular hemoglobin, RDW = red cell distribution width, HDW = hemoglobin distribution width, PLT = platelets, MPV = mean platelet

volume, NEUT = neutrophil, LYMPH = lymphocyte, MONO = monocytes, EOS = eosinophil, BASO = basophilic granulocyte, LUC = unstained large cells, TP = Total Protein, ALB = Albumin, AST = Aspartate Transaminase, ALT = Alanine Aminotransferase, ALP = Alkaline Phosphatase, TC = Total Cholesterol, TG = Triglyceride, GLU = Glucose, CREA = Creatinine, HDL = High-Density Lipoprotein, LDL = Low Density Lipoprotein, BUN = Blood Urea Nitrogen, GGT = Gamma-Glutamyl Transpeptidase, CK = Creatine Kinase ‘#’ = absolute value, ‘%’ = percentage value. Sd = standard deviation, Se = standard error.

**Table S3.** Comparison of hematologic parameters between nursery pigs at different ages. Significant differences are indicated by different lowercase letters ( $p < 0.05$ ) and uppercase letters ( $p < 0.01$ ).

| Variable | Unit                | days                       |                             |                            |                            |
|----------|---------------------|----------------------------|-----------------------------|----------------------------|----------------------------|
|          |                     | 20                         | 30                          | 40                         | 50                         |
| WBC      | 10 <sup>9</sup> /L  | 11.51 <sup>A</sup> ±0.76   | 15.97 <sup>B</sup> ±0.6     | 15.06 <sup>B</sup> ±0.6    | 20.08 <sup>C</sup> ±0.62   |
| RBC      | 10 <sup>12</sup> /L | 6.86 <sup>A</sup> ±0.11    | 7.17 <sup>B</sup> ±0.09     | 6.38 <sup>C</sup> ±0.09    | 6.61 <sup>AC</sup> ±0.09   |
| HGB      | g/dL                | 116.64 <sup>A</sup> ±2.39  | 112.10 <sup>AB</sup> ±1.86  | 108.18 <sup>BC</sup> ±1.87 | 105.33 <sup>C</sup> ±1.94  |
| HCT      | %                   | 39.26 <sup>a</sup> ±0.81   | 37.29 <sup>b</sup> ±0.63    | 36.17 <sup>b</sup> ±0.63   | 36.18 <sup>b</sup> ±0.66   |
| MCV      | fL                  | 57.03 <sup>A</sup> ±0.81   | 52.27 <sup>B</sup> ±0.62    | 56.65 <sup>A</sup> ±0.62   | 54.77 <sup>C</sup> ±0.65   |
| MCH      | pg                  | 16.99 <sup>A</sup> ±0.26   | 15.78 <sup>B</sup> ±0.2     | 16.89 <sup>A</sup> ±0.21   | 15.94 <sup>B</sup> ±0.21   |
| MCHC     | g/dL                | 296.96 <sup>A</sup> ±1.81  | 301.63 <sup>B</sup> ±1.41   | 298.36 <sup>AB</sup> ±1.42 | 291.00 <sup>C</sup> ±1.47  |
| CHCM     | g/dL                | 326.82±2.28                | 324.93±1.78                 | 321.71±1.78                | 321.70±1.85                |
| CH       | pg                  | 18.68 <sup>A</sup> ±0.31   | 16.98 <sup>B</sup> ±0.24    | 18.13 <sup>AC</sup> ±0.24  | 17.57 <sup>BC</sup> ±0.25  |
| RDW      | %                   | 20.54 <sup>A</sup> ±0.49   | 22.69 <sup>B</sup> ±0.38    | 18.98 <sup>C</sup> ±0.38   | 17.59 <sup>D</sup> ±0.4    |
| HDW      | g/dL                | 20.74±0.41                 | 21.21±0.32                  | 21.38±0.32                 | 20.85±0.33                 |
| PLT      | 10 <sup>9</sup> /L  | 236.50 <sup>a</sup> ±36.46 | 289.30 <sup>ab</sup> ±28.35 | 258.22 <sup>b</sup> ±28.99 | 356.61 <sup>a</sup> ±29.55 |
| MPV      | fL                  | 9.34±0.32                  | 9.40±0.25                   | 9.86±0.25                  | 9.51±0.27                  |
| %NEUT    | %                   | 42.49 <sup>A</sup> ±2.06   | 39.87 <sup>AB</sup> ±1.62   | 34.52 <sup>C</sup> ±1.6    | 36.42 <sup>BC</sup> ±1.71  |
| %LYMPH   | %                   | 43.54 <sup>AB</sup> ±2.38  | 46.62 <sup>AB</sup> ±1.82   | 42.20 <sup>A</sup> ±1.82   | 48.71 <sup>B</sup> ±1.94   |
| %MONO    | %                   | 7.50 <sup>A</sup> ±0.6     | 5.62 <sup>B</sup> ±0.47     | 11.82 <sup>C</sup> ±0.47   | 7.75 <sup>A</sup> ±0.48    |
| %EOS     | %                   | 3.70±0.51                  | 4.68±0.39                   | 4.80±0.39                  | 4.69±0.4                   |
| %BASO    | %                   | 0.35±0.03                  | 0.33±0.02                   | 0.40±0.02                  | 0.39±0.02                  |
| %LUC     | %                   | 2.28 <sup>AB</sup> ±0.24   | 1.82 <sup>A</sup> ±0.18     | 2.70 <sup>B</sup> ±0.18    | 1.94 <sup>A</sup> ±0.19    |
| #NEUT    | 10 <sup>9</sup> /L  | 4.85 <sup>A</sup> ±0.42    | 6.41 <sup>B</sup> ±0.33     | 5.20 <sup>A</sup> ±0.32    | 7.23 <sup>B</sup> ±0.34    |
| #LYMPH   | 10 <sup>9</sup> /L  | 4.83±0.52                  | 7.33±0.4                    | 6.48±0.4                   | 9.44±0.42                  |
| #MONO    | 10 <sup>9</sup> /L  | 0.86 <sup>A</sup> ±0.12    | 0.88 <sup>A</sup> ±0.09     | 1.84 <sup>B</sup> ±0.09    | 1.55 <sup>C</sup> ±0.1     |
| #EOS     | 10 <sup>9</sup> /L  | 0.41 <sup>a</sup> ±0.12    | 0.77 <sup>b</sup> ±0.09     | 0.95 <sup>b</sup> ±0.1     | 0.95 <sup>b</sup> ±0.1     |
| #BASO    | 10 <sup>9</sup> /L  | 0.04 <sup>A</sup> ±0       | 0.05 <sup>AB</sup> ±0       | 0.06 <sup>B</sup> ±0       | 0.08 <sup>C</sup> ±0       |
| #LUC     | 10 <sup>9</sup> /L  | 0.27 <sup>a</sup> ±0.04    | 0.30 <sup>a</sup> ±0.03     | 0.42 <sup>b</sup> ±0.03    | 0.36 <sup>ab</sup> ±0.03   |

**Table S4.** Comparison of biochemical parameters between nursery pigs at different ages. Significant differences are indicated by different lowercase letters ( $p < 0.05$ ) and uppercase letters ( $p < 0.01$ ).

| Variable | Unit | days                     |                          |                           |                                       |
|----------|------|--------------------------|--------------------------|---------------------------|---------------------------------------|
|          |      | 20                       | 30                       | 40                        | 50                                    |
| TP       | g/dL | 50.18 <sup>A</sup> ±0.79 | 48.17 <sup>B</sup> ±0.66 | 52.54 <sup>C</sup> ±0.68  | 54.49 <sup>D</sup> ±0.72              |
| ALB      | g/dL | 32.85 <sup>A</sup> ±0.73 | 29.71 <sup>B</sup> ±0.6  | 26.60 <sup>C</sup> ±0.63  | 24.79 <sup>D</sup> ±0.66              |
| AST      | U/L  | 60.67 <sup>A</sup> ±2.84 | 45.89 <sup>B</sup> ±2.36 | 44.36 <sup>B</sup> ±2.45  | 40.57 <sup>B</sup> ±2.6               |
| ALT      | U/L  | 50.24 <sup>A</sup> ±2.1  | 36.33 <sup>B</sup> ±1.74 | 46.88 <sup>AC</sup> ±1.81 | 43.63 <sup>C</sup> ±1.92              |
| ALP      | U/L  | 60.72 <sup>A</sup> ±4.62 | 59.72 <sup>A</sup> ±3.78 | 40.41 <sup>B</sup> ±3.99  | 29.35 <sup>B</sup> ±4.23 <sup>?</sup> |

|      |       |                            |                            |                            |                             |
|------|-------|----------------------------|----------------------------|----------------------------|-----------------------------|
| TC   | mg/dL | 100.72 <sup>A</sup> ±3.96  | 60.92 <sup>B</sup> ±3.25   | 80.30 <sup>C</sup> ±3.42   | 81.35 <sup>C</sup> ±3.62    |
| TG   | mg/dL | 42.29 <sup>A</sup> ±2.67   | 34.05 <sup>B</sup> ±2.19   | 54.46 <sup>C</sup> ±2.34   | 51.42 <sup>C</sup> ±2.44    |
| GLU  | mg/dL | 92.19 <sup>A</sup> ±2.85   | 79.66 <sup>B</sup> ±2.37   | 94.30 <sup>A</sup> ±2.46   | 98.06 <sup>A</sup> ±2.61    |
| CREA | mg/dL | 95.49 <sup>A</sup> ±2.49   | 83.16 <sup>B</sup> ±2.04   | 60.36 <sup>C</sup> ±2.15   | 86.23 <sup>B</sup> ±2.28    |
| HDL  | mg/dL | 55.06 <sup>A</sup> ±1.76   | 37.62 <sup>B</sup> ±1.44   | 43.05 <sup>C</sup> ±1.52   | 38.23 <sup>B</sup> ±1.61    |
| LDL  | mg/dL | 73.02 <sup>A</sup> ±4.14   | 36.26 <sup>B</sup> ±3.4    | 57.36 <sup>C</sup> ±3.58   | 63.45 <sup>AC</sup> ±3.79   |
| BUN  | mg/dL | 3.49 <sup>A</sup> ±0.17    | 3.48 <sup>A</sup> ±0.14    | 2.26 <sup>B</sup> ±0.14    | 3.81 <sup>A</sup> ±0.15     |
| GGT  | U/L   | 58.15 <sup>A</sup> ±8.78   | 95.89 <sup>B</sup> ±7.2    | 90.00 <sup>B</sup> ±7.58   | 133.30 <sup>C</sup> ±8.03   |
| CK   | U/L   | 802.50 <sup>A</sup> ±93.45 | 477.10 <sup>B</sup> ±74.78 | 1078.00 <sup>C</sup> ±79.9 | 614.00 <sup>AB</sup> ±84.62 |
